# Supplementary material for: Predictive Network-Medicine Modeling Prioritizes Combinatory Drugs for Amyotrophic Lateral Sclerosis
Source: Research Square preprint supplement (doi:10.21203/rs.3.rs-8762264/v1), 2026-02-24
Supplement: Supplementary file 1 [file 7ca15d096fa08b435fd15cbf.docx]

## Supplementary Materials

Table S1: Twelve compounds identified to be strictly-reversing i.e. show only reversal signal (negative connectivity scores) with respect to the ALS signatures. MOA: mechanism of action.

| **Compound Name** | **Annotated MOA** |
| --- | --- |
| BMS-777607 | c-Met inhibitor |
| Dasatinib | Abl kinase inhibitor |
| Entinostat | HDAC inhibitor |
| Everolimus | MTOR inhibitor |
| GSK-1070916 | Aurora kinase inhibitor |
| Mocetinostat | HDAC inhibitor |
| U-18666A | Oxidosqualene cyclase inhibitor |
| VE-821 | ATR kinase inhibitor |
| Vorinostat | HDAC inhibitor |
| WZ-7043 | CSF1R inhibitor |
| ZM-447439 | Aurora kinase inhibitor |
| Zosuquidar | P-glycoprotein inhibitor |
